# Supplementary material for: Iron–nickel hexacyanoferrate bilayer as an advanced electrocatalyst for H2O2reduction
Source: Royal Society of Chemistry journal article supplement (doi:10.1039/c6ra24128j), 2016-01-01
Supplement: c6ra24128j1.pdf [file c6ra24128j1.pdf]

## EXPERIMENTAL

### Materials

Experiments were carried out with Millipore Milli-Q water. All inorganic salts ( $\text{FeCl}_3 \cdot 6\text{H}_2\text{O}$ ,  $\text{NiCl}_2 \cdot 6\text{H}_2\text{O}$  and  $\text{K}_3[\text{Fe}(\text{CN})_6]$ ) and hydrogen peroxide (30 vol %) were obtained at the highest purity from Reachim (Russia) and used as received.

Glassy carbon disk electrodes (SU-2500, 2.0 mm in diameter) pressed in Teflon were used as working electrodes. Prior to use, the working electrodes were mechanically polished in a water suspension of alumina powder with particle size of 0.3  $\mu\text{m}$  and then 0.05  $\mu\text{m}$  (Sigma Aldrich) up to the mirror finish observed.

### Instrumentation

Electrochemical experiments were made in a three-compartment electrochemical cell with  $\text{Ag}|\text{AgCl}|1\text{ M KCl}$  reference electrode. PalmSens potentiostat/galvanostat (PalmSens Instruments BV, Netherlands) interfaced to PC was used.

The flow injection (FIA) system consisted of a Cole Parmer (Vernon Hills, IL) peristaltic pump (7519-10), homemade flow-through wall-jet cell with 0.6 mm nozzle positioned at 1-2 mm distance from the surface of disk electrode, ( $\text{Ag}|\text{AgCl}|1\text{ M KCl}$ ) reference, homemade injector, and PalmSens electrochemical interface interfaced to an IBM PC. Flow rates used were in the range 0.2–4  $\text{mL} \cdot \text{min}^{-1}$ . In FIA experiments, the peak current density values were taken for data treatment, sample volume was 50  $\mu\text{L}$ , and working electrode potential was 0.00–0.05 V, allowing hydrogen peroxide reduction on Prussian Blue-modified electrodes. The carrier solution in FIA experiments was 0.05 M phosphate buffer pH 6.0 containing 0.1 M KCl as the supporting electrolyte.

Concentration of hydrogen peroxide in stock solutions was controlled by optical density at 230 nm with an LKB-Ultraspec U11 spectrophotometer (Broma, Sweden).

## Methods

Electrodeposition of Prussian Blue was carried out in cyclic voltammetric conditions in the range from 0.4 V to 0.75 V at a sweep rate of  $0.04 \text{ V}\cdot\text{s}^{-1}$  during 1 ÷ 8 cycles. The growing solution contained 2 mM  $\text{K}_3[\text{Fe}(\text{CN})_6]$  and 2 mM  $\text{FeCl}_3$ . A solution of 0.1 M HCl and 0.1 M KCl was used as a supporting electrolyte.

For deposition of nickel hexacyanoferrate (NiHCF) the solution containing 0.5 mM  $\text{K}_3[\text{Fe}(\text{CN})_6]$ , 1 mM  $\text{NiCl}_2\cdot 6\text{H}_2\text{O}$  and 0.5 M KCl in 0.1 M HCl was used. The deposition was carried out by cycling the applied potential from 0.0 V to 0.75 V at a sweep rate of  $0.1 \text{ V}\cdot\text{s}^{-1}$  during 5 ÷ 25 cycles.

Layer-by-layer deposition of Prussian Blue – Ni hexacyanoferrate composites was made in different three-compartment electrochemical cells: one was with the solution of precursors for PB electrosynthesis, another contained mixture for NiHCF electrodeposition. After the deposition of one layer, electrode was intensively rinsed with Milli-Q water and moved to another cell.

After deposition transition metals hexacyanoferrate films were electrochemically activated by cycling in the background electrolyte at a sweep rate of  $40 \text{ mV}\cdot\text{s}^{-1}$  until a stable voltammogram was obtained and then annealed at  $100^\circ\text{C}$  during 1 h to remove weakly bounded water.

Stability measurements were carried out in a flow-through wall-jet cell under continuous flow of 1 mM  $\text{H}_2\text{O}_2$ ; 0.05 M phosphate buffer pH 6.0 with 0.1 M KCl was used as supporting electrolyte.

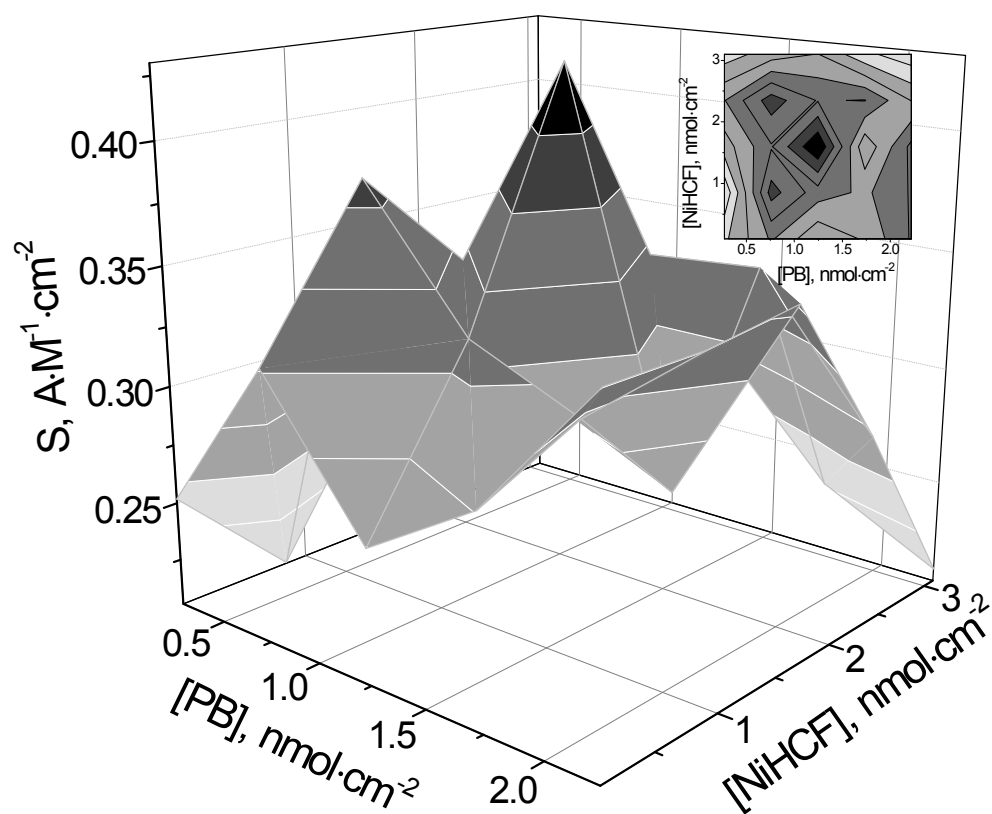

Figure 1S. Sensitivity as current response towards continuous flow of 1 mM  $H_2O_2$  divided by its concentration (1 mM) as a function of surface coverages of iron and nickel hexacyanoferrates.

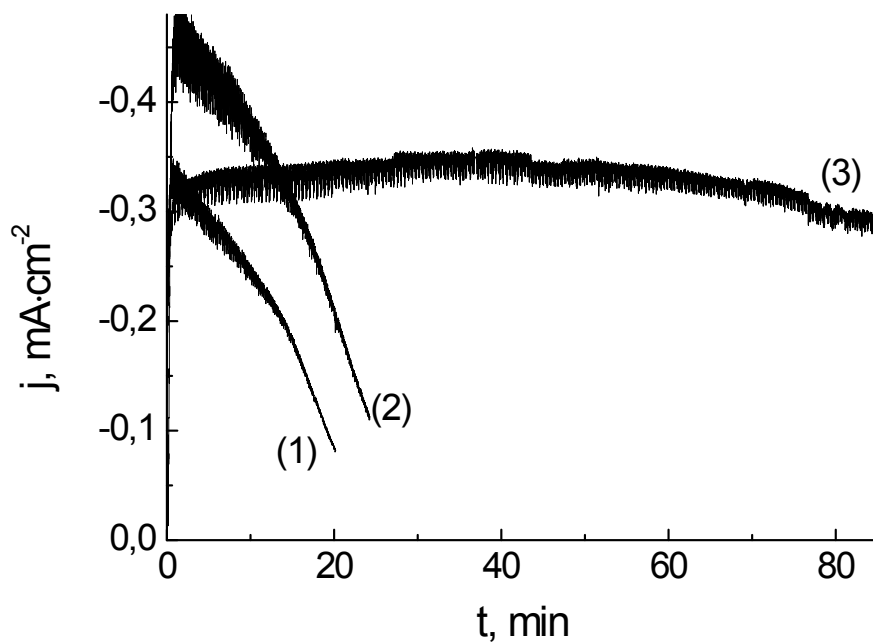

Figure 2S. Operational stability in wall-jet cell under continuous flow of 1 mM H<sub>2</sub>O<sub>2</sub> of conventional Prussian Blue (1, 2): (1) –  $\Gamma_{PB} = 0.85 \text{ nmol cm}^{-2}$ , (2) –  $\Gamma_{PB} = 1.3 \text{ nmol cm}^{-2}$  - and hybrid Fe-Ni hexacyanoferrate (3); 0.05 M phosphate buffer pH 6.0 with 0.1 M KCl.

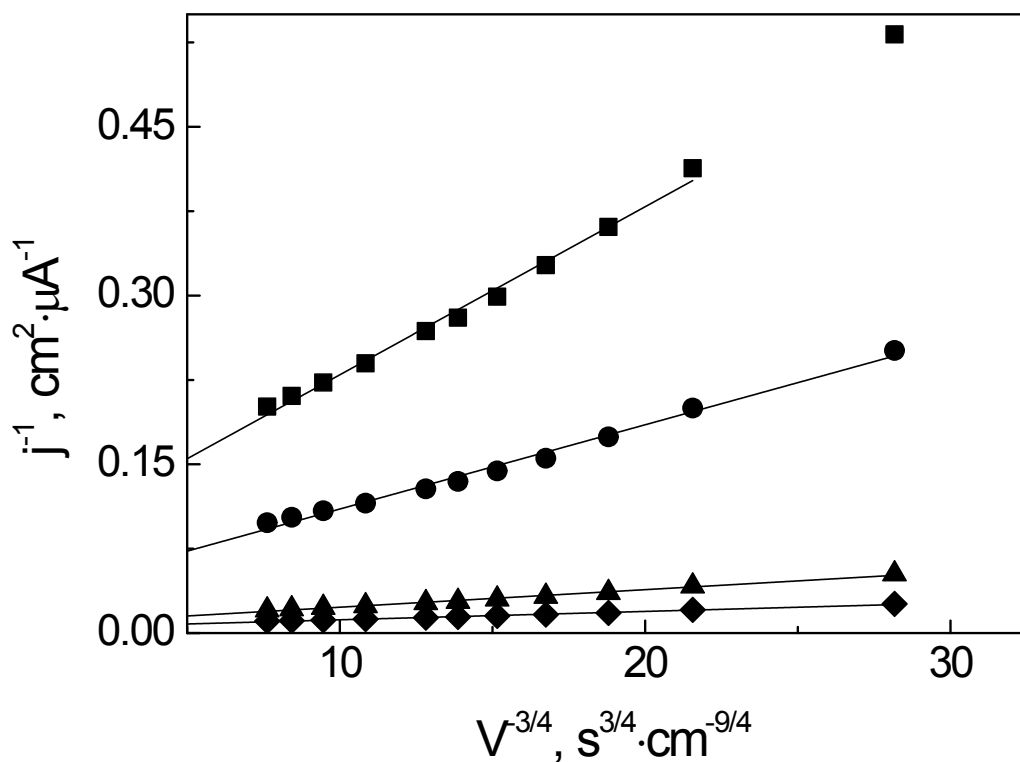

Figure 3S. Current density of hydrogen peroxide reduction as a function of the volume flow rate in a wall-jet cell: (■) [H<sub>2</sub>O<sub>2</sub>]=0.005 mM; (●) [H<sub>2</sub>O<sub>2</sub>]=0.01 mM; (▲) [H<sub>2</sub>O<sub>2</sub>]=0.05 mM, (◆) [H<sub>2</sub>O<sub>2</sub>]=0.1 mM; 50 mM phosphate, pH 6.0 with 0.1 M KCl.
